# Supplementary material
Source: PubMed Central journal article supplement (PMC5834154)
Supplement: supplemental_figure_3_mdx416.pdf [file supplemental_figure_3_mdx416.pdf]

| Overall         |            | Patient response |          |       |
|-----------------|------------|------------------|----------|-------|
|                 |            | Positive         | Negative | Total |
| PDX<br>response | Positive** | 59               | 24       | 83    |
|                 | Negative   | 14               | 32       | 46    |
|                 | Total      | 73               | 56       | 129   |

\* Number of patients - 92

\*\* Positive response - exact concordant with RECIST in patients

### Supplemental Figure 3.
