# Supplementary material
Source: PubMed Central journal article supplement (PMC5834154)

**A.**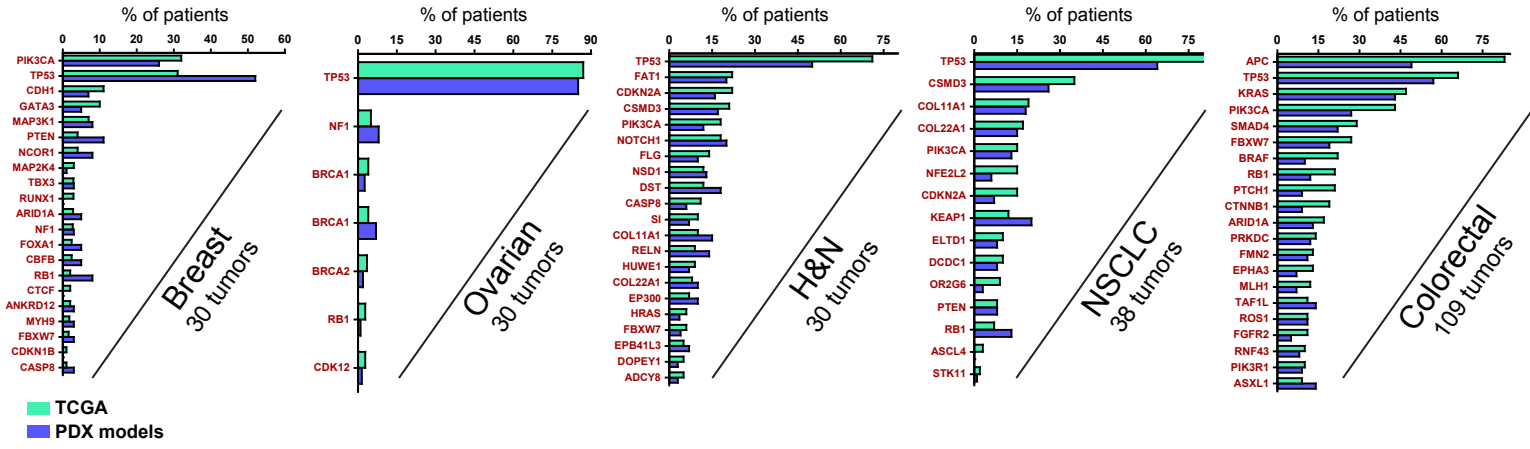**B.**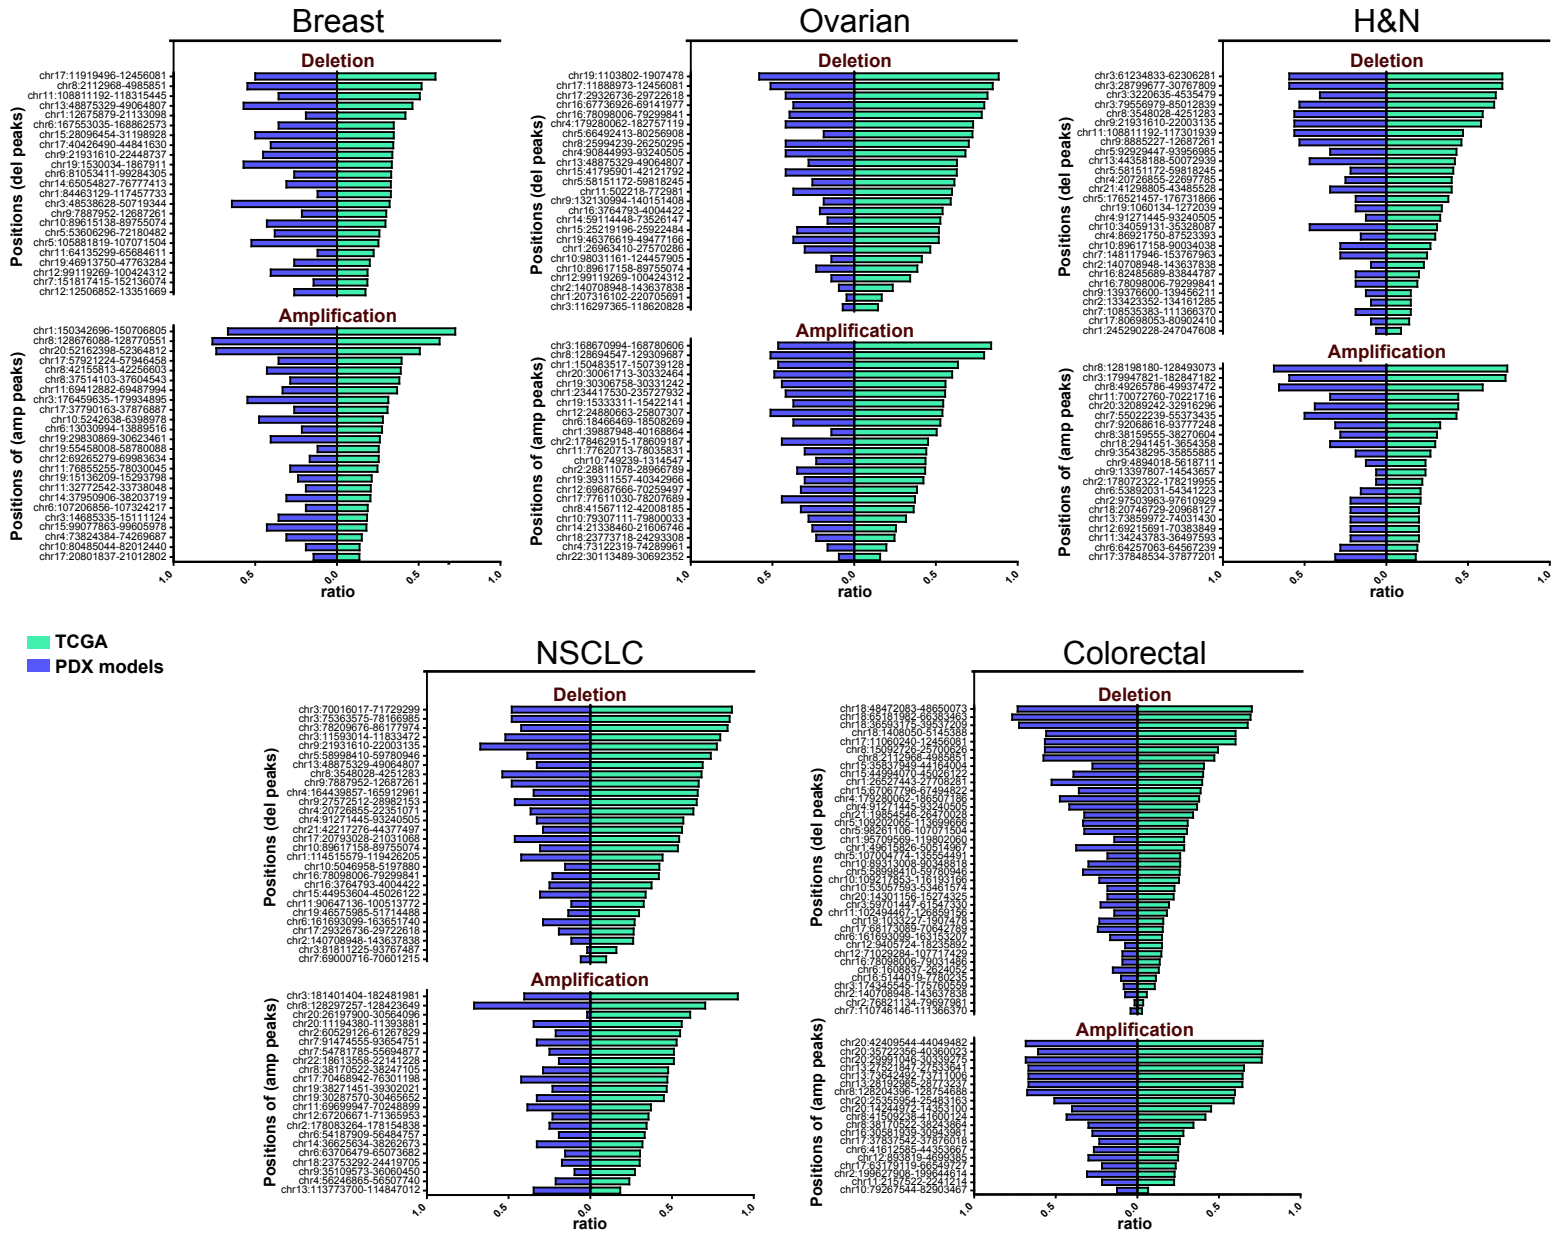**Supplementary Figure 1.**

Supplement: supplemental_figure_1_mdx416.pdf [file supplemental_figure_1_mdx416.pdf]

**A.**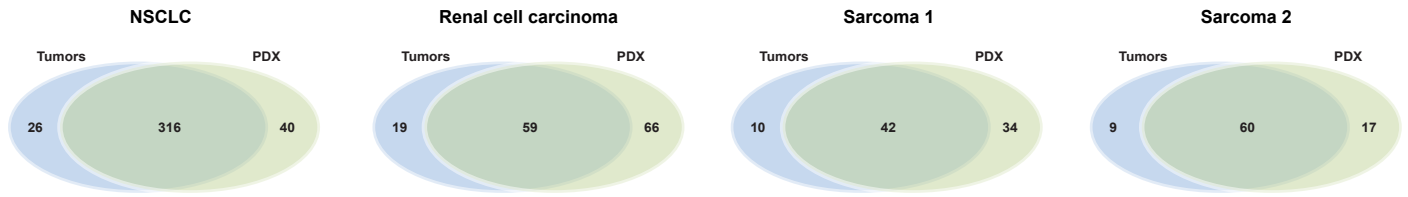**B.**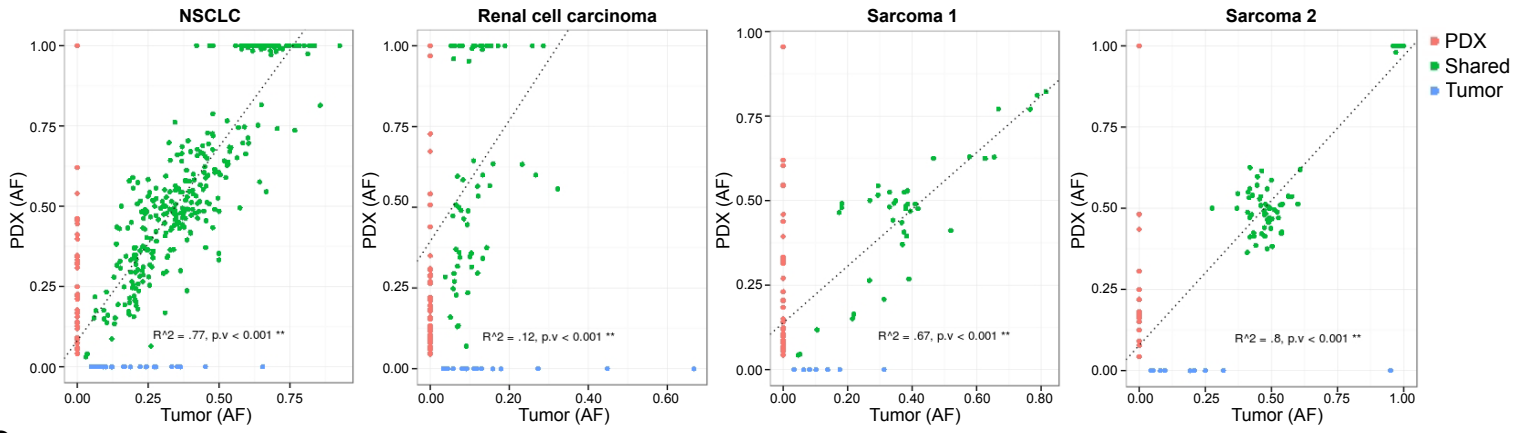**C.**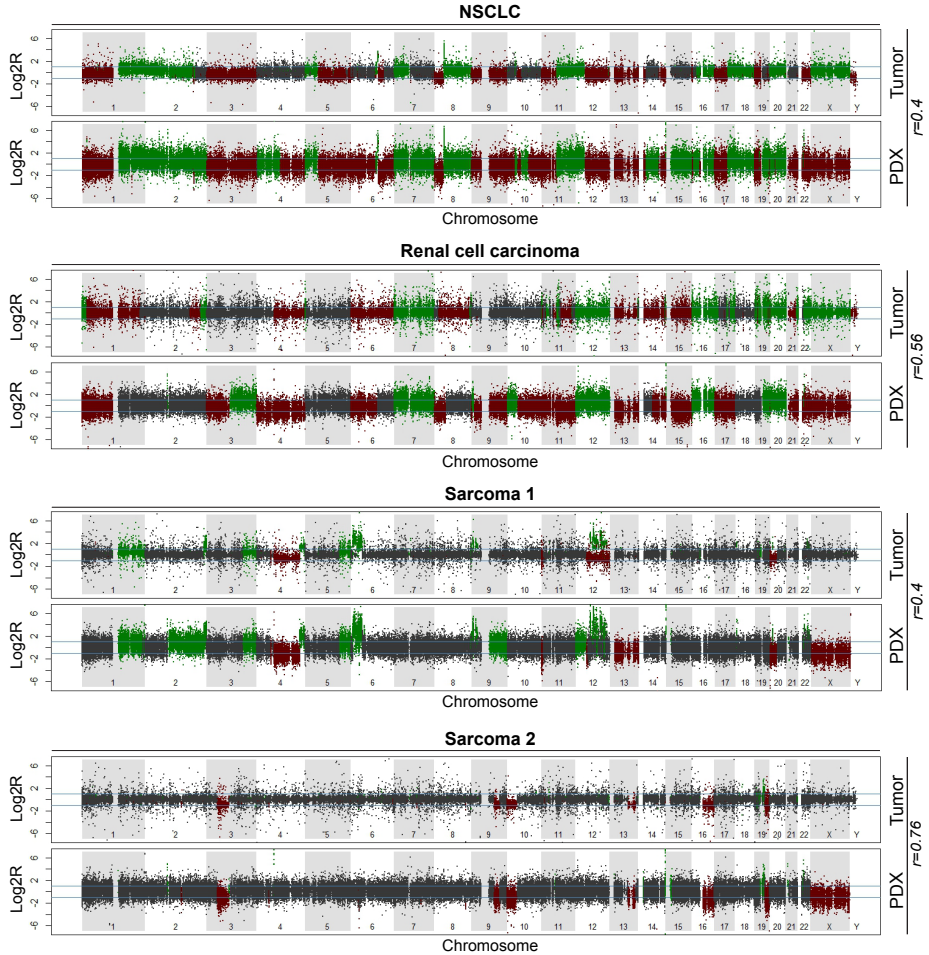**Supplemental Figure 2**

Supplement: supplemental_figure_2_mdx416.pdf [file supplemental_figure_2_mdx416.pdf]

**A**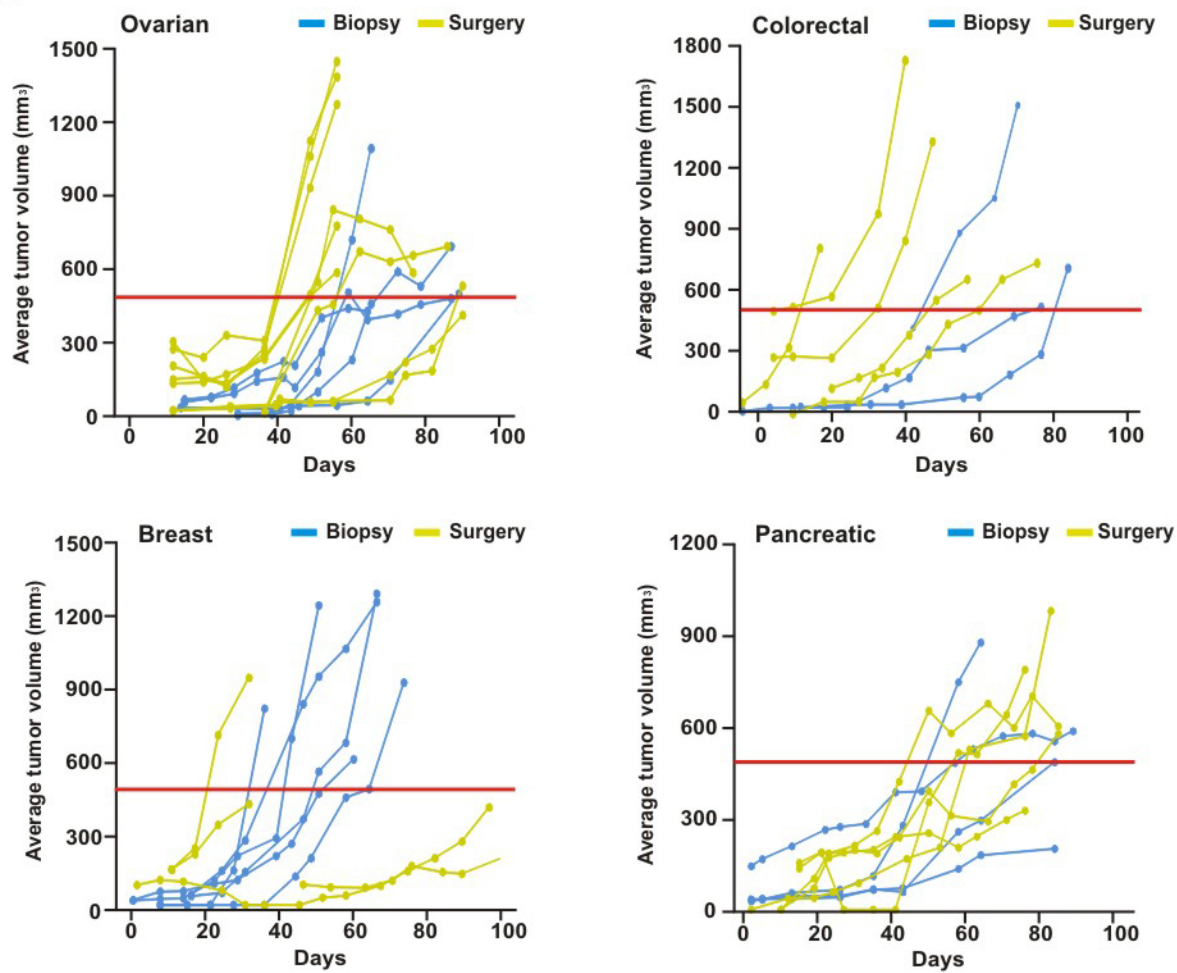**B**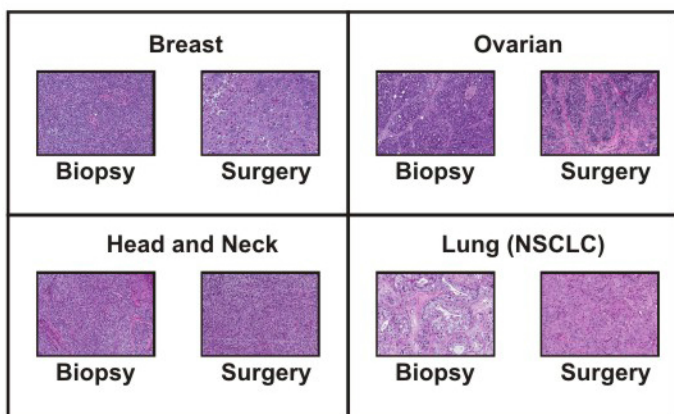**C**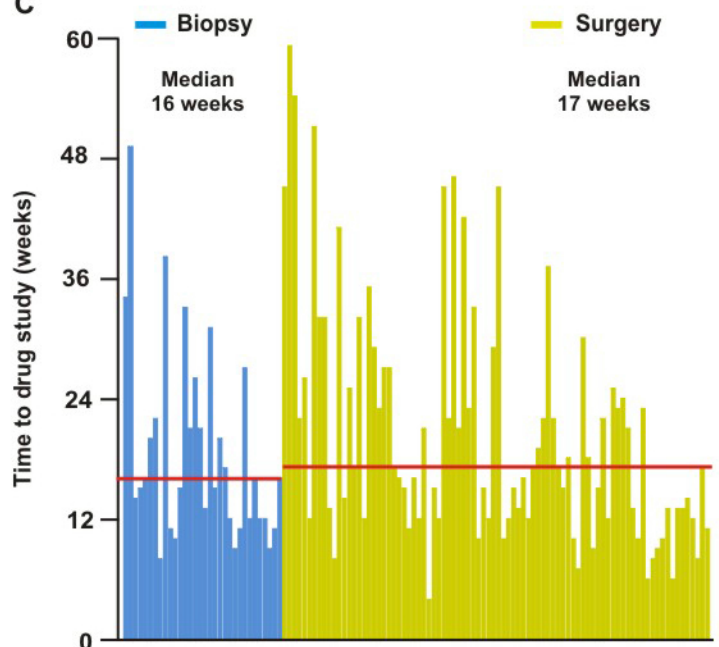

**Supplemental Figure 4.**

Supplement: supplemental_figure_4_mdx416.pdf [file supplemental_figure_4_mdx416.pdf]
